# Supplementary material for: Polygenic polymorphism is associated with NKG2A repertoire and influences lymphocyte phenotype and function
Source: PubMed Central journal article supplement — Blood Adv. 2024 Aug 22;8(20):5382–99. doi: 10.1182/bloodadvances.2024013508 (PMC11568789; doi:10.1182/bloodadvances.2024013508), 2024-08-22
Supplement: BLOODA_ADV-2024-013508-mmc1.pdf [file BLOODA_ADV-2024-013508-mmc1.pdf]

## SUPPLEMENTARY MATERIALS

| Reagent                      | Color         | Clone  | Company       | Isotype        |
|------------------------------|---------------|--------|---------------|----------------|
| Live/Dead Fixable Aqua Stain | AmCyan        |        | Thermo Fisher |                |
| CD3                          | BV650         | UCHT1  | BD            | IgG1 Mouse, K  |
| CD56                         | ECD           | N901   | IOtest (BC)   | IgG1 Mouse, K  |
| NKG2C                        | APC/FITC      | REA205 | Miltenyi      | REA            |
| NKG2A                        | PeCy7         | Z199   | IOtest (BC)   | IgG2b Mouse, K |
| KIR2DL1/S1                   | PeCy5.5       | EB6B   | IOtest (BC)   | IgG1 Mouse, K  |
| KIR2DL2/L3/S2                | BV605         | CH-L   | BD            | IgG2b Mouse, K |
| KIR3DL1                      | BV711         | DX9    | BD            | IgG1 Mouse, K  |
| KIR3DL1/S1                   | APCVio770     | REA168 | Miltenyi      | REA            |
| CD107a                       | BV786         | H4A3   | BD            | IgG1 Mouse, K  |
| IFN- $\gamma$                | AF700         | B27    | BD            | IgG1 Mouse, K  |
| CD94                         | APC           | NA     | Miltenyi      | REA            |
| TCR $\gamma$ d               | PE            | B1     | Biolegend     | IgG1 Mouse, K  |
| Vd1                          | APCVio770     | REA173 | Miltenyi      | REA            |
| Vd2                          | PerCP-Vio 700 | REA771 | Miltenyi      | REA            |
| CD4                          | Alexa 700     | SK3    | Biolegend     | IgG1 Mouse, K  |
| CD8                          | BV570         | RPA-T8 | Biolegend     | IgG1 Mouse, K  |
| CD16                         | BV786/BV421   | 3G8    | Biolegend     | IgG1 Mouse, K  |
| Fc $\epsilon$ RI $\gamma$    | FITC          | NA     | Millipore     | IgG Rabbit     |
| HLA-E                        | PE            | 3D12   | Biolegend     | IgG1 Mouse, K  |
| HLA-ABC                      | FITC          | REA230 | Miltenyi      | REA            |
| HLA-BC                       | FITC          | REA672 | Miltenyi      | REA            |
| HLA-C                        | PE            | DT-9   | BD            | IgG2b Mouse, K |

**Supplemental Table 1.** Antibodies used for phenotyping and functional analysis.

# Supplemental figure 1

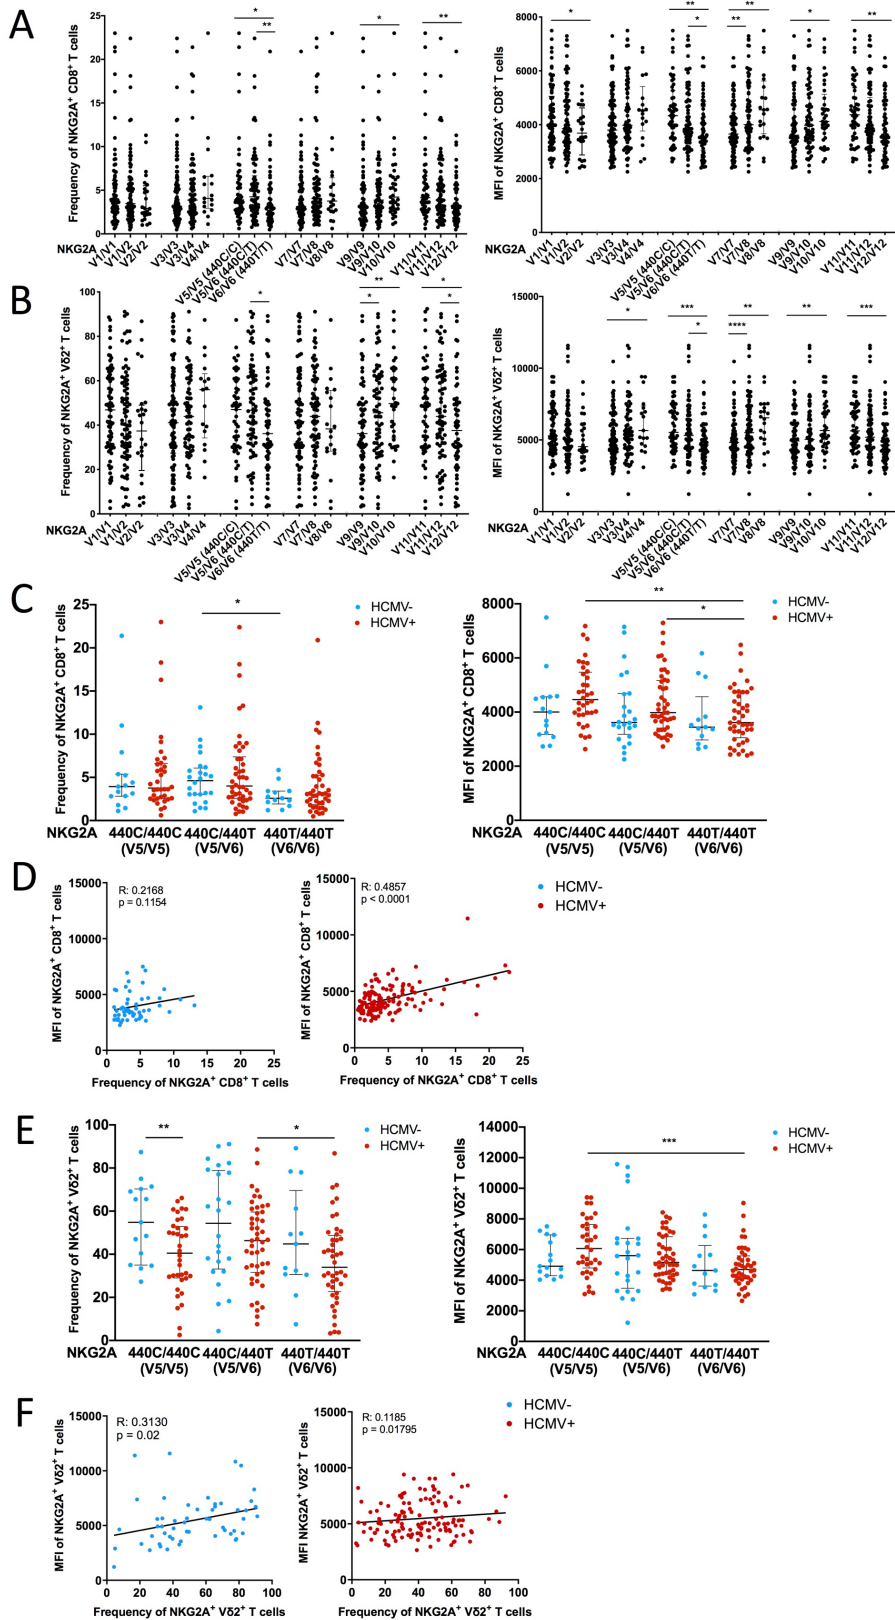

**Supplemental Fig. 1. *NKG2A* non-coding SNPs discriminate *NKG2A* expression on CD8<sup>+</sup> T cells and Vδ2<sup>+</sup> T cells.** (A) *NKG2A* frequency and MFI of CD8<sup>+</sup> T cells grouped by selected *NKG2A* SNPs. (B) *NKG2A* frequency and MFI of Vδ2<sup>+</sup> T cells grouped by selected *NKG2A* SNPs. (C) *NKG2A* frequency and MFI of CD8<sup>+</sup> T cells stratified by *NKG2A* 440C/T genotype and HCMV serostatus. (D) Correlation between *NKG2A* MFI and *NKG2A*<sup>+</sup> frequency among CD8<sup>+</sup> T cells in HCMV<sup>-</sup> (blue), HCMV<sup>+</sup> (red) (E) *NKG2A* frequency and MFI of Vδ2<sup>+</sup> T cells stratified by *NKG2A* 440C/T genotype and HCMV serostatus. (F) Correlation between *NKG2A* MFI and *NKG2A*<sup>+</sup> frequency among Vδ2<sup>+</sup> T cells in HCMV<sup>-</sup> (blue), HCMV<sup>+</sup> (red). Mann-Whitney tests were performed and median ± IQRs presented panel A-C and E. Correlations were assessed using the Pearson correlation coefficient panel D and F. Symbols represent individual samples. \**p* < 0.05, \*\**p* < 0.01, \*\*\**p* < 0.001, and \*\*\*\**p* < 0.0001.

Supplemental figure 2

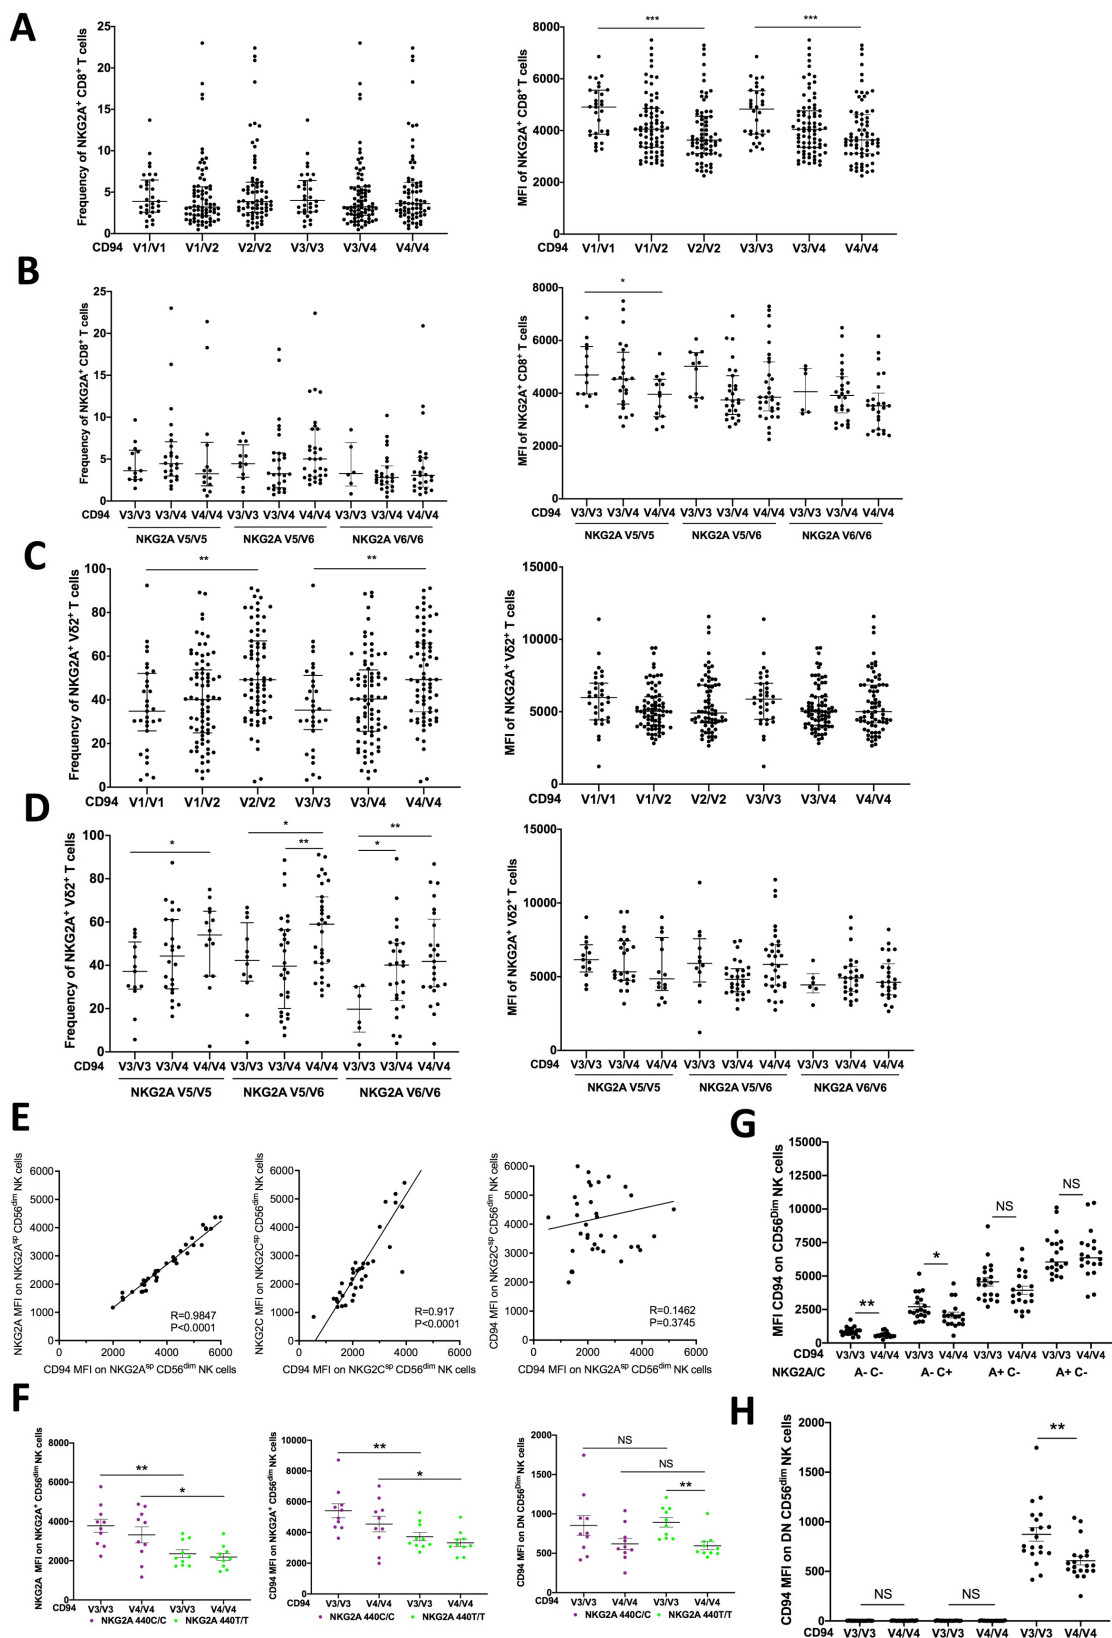

**Supplemental Fig. 2. *CD94* polymorphism alone or combined with *NKG2A* polymorphism predicts *NKG2A* expression on  $CD8^+$  T cells and  $V\delta 2^+$  T cells.** (A)  $CD8^+$  T cell *NKG2A* frequency and MFI grouped by *CD94* polymorphism. (B)  $CD8^+$  T cell *NKG2A* frequency and MFI grouped by *CD94* and *NKG2A* polymorphism. (C)  $V\delta 2^+$  T cell *NKG2A* frequency and MFI grouped by *CD94* polymorphism. (D)  $V\delta 2^+$  T cell *NKG2A* frequency and MFI grouped by *CD94* and *NKG2A* polymorphism. (E) Correlation between *NKG2A*, *NKG2C* and *CD94* MFI on  $CD56^{\dim}$  NK cells. (F) *NKG2A* and *CD94* MFI on subpopulations of  $CD56^{\dim}$  NK cells, stratified by *CD94* SNPs in conjunction with *NKG2A* variants. (G) *CD94* MFI stratified by *CD94* SNPs in different  $CD56^{\dim}$  NK cells population defined by *NKG2C* and *NKG2A* positivity. (H) *CD94* MFI on DN (*NKG2A*<sup>-</sup>*NKG2C*<sup>-</sup>) NK cells cell stratified by *CD94* SNPs. Mann-Whitney tests were performed and median  $\pm$  IQRs presented panel A-D. Correlations were assessed using the Pearson correlation coefficient panel E. T-tests were performed and mean  $\pm$  SEM presented in panel G-H. Symbols represent individual samples. \* $p < 0.05$ , \*\* $p < 0.01$ , \*\*\* $p < 0.001$ , and \*\*\*\* $p < 0.0001$ .

## Supplemental figure 3

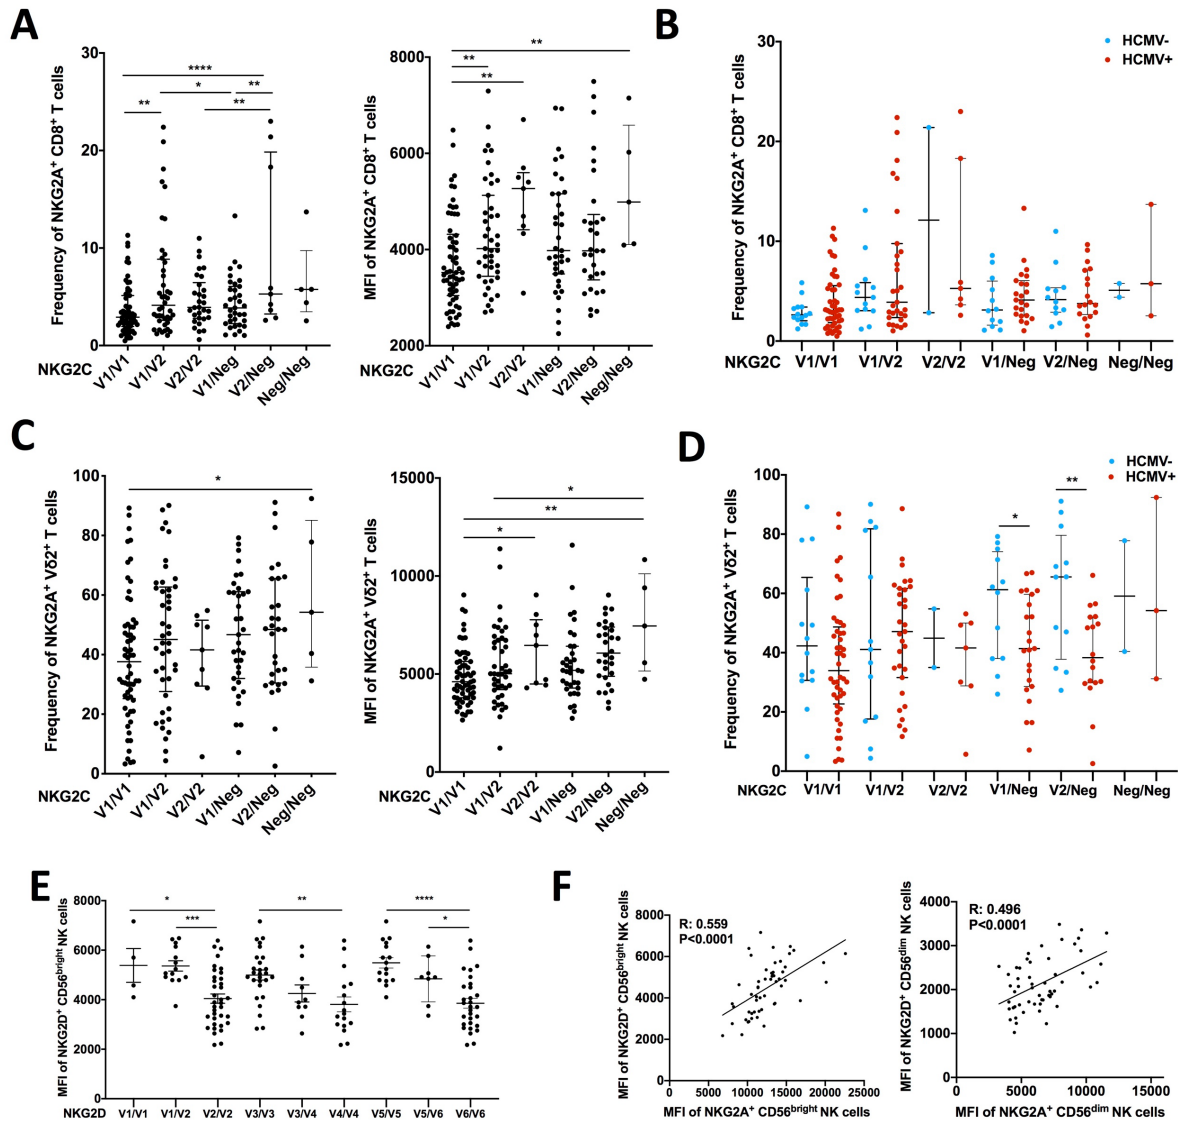

**Supplemental Fig. 3. *NKG2C* polymorphism predicts variable NKG2A expression on CD8<sup>+</sup> T cells and Vδ2<sup>+</sup> T cells.** (A) CD8<sup>+</sup> T cell NKG2A frequency and MFI grouped by *NKG2C* polymorphism. (B) CD8<sup>+</sup> T cell NKG2A frequency and MFI grouped by *NKG2C* polymorphism and HCMV serostatus. (C) Vδ2<sup>+</sup> T cell NKG2A frequency and MFI grouped by *NKG2C* polymorphism. (D) Vδ2<sup>+</sup> T cell NKG2A frequency and MFI grouped by *NKG2C* polymorphism and HCMV serostatus. (E) NKG2D MFI on CD56<sup>bright</sup> NK cells stratified by *NKG2D* SNPs. (F)

NKG2D MFI in different NK cell compartments (CD56<sup>dim</sup> NKG2A<sup>-</sup>, CD56<sup>dim</sup> NKG2A<sup>+</sup>, CD56<sup>bright</sup>) and correlation between NKG2A and NKG2D MFI. Mann-Whitney tests were performed and median  $\pm$  IQRs presented in panels A-D. T-tests were performed and mean  $\pm$  SEM presented in panel E. Correlations were assessed using the Pearson correlation coefficient in panel F. Symbols represent individual samples. \* $p < 0.05$ , \*\* $p < 0.01$ , \*\*\* $p < 0.001$ , and \*\*\*\* $p < 0.0001$ .

## Supplemental figure 4

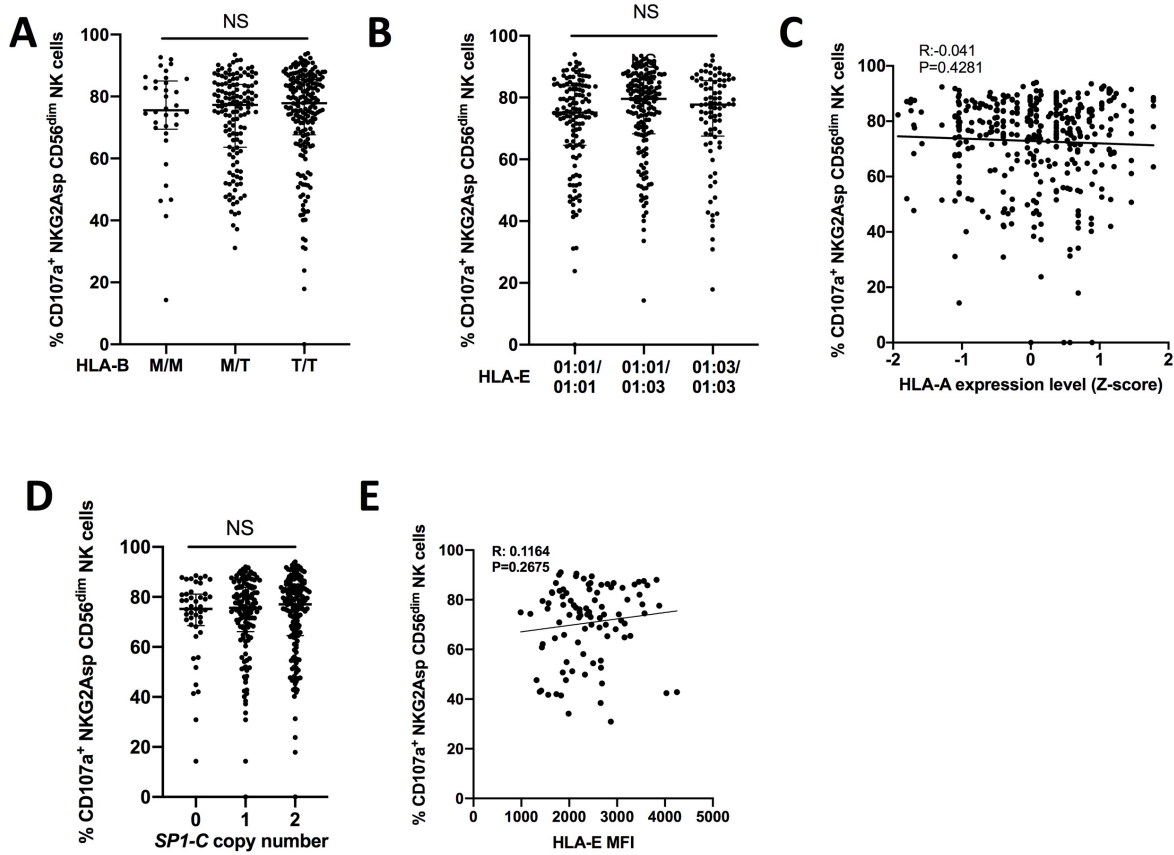

**Supplemental Fig. 4. HLA-E expression or scoring methods do not predict NKG2A education on CD56<sup>dim</sup> NK cells.** PBMC from 400 different donors were cultured with K562 HLA-E KO target cells in a CD107a assay. (A) NKG2A<sup>sp</sup> degranulation frequency stratified by HLA-B leader peptide. (B) NKG2A<sup>sp</sup> degranulation frequency stratified by HLA-E alleles. (C) NKG2A<sup>sp</sup> degranulation frequency stratified by HLA-A Z-score. (D) NKG2A<sup>sp</sup> degranulation frequency stratified by Signal peptide SP-1C. (E) Correlation between HLA-E MFI and NKG2A<sup>sp</sup> degranulation frequency on PBMC of 100 donors cultured with 721.221 HLA-E KO target cells in a CD107a assay. Mann-Whitney tests were performed and median  $\pm$  IQRs presented in panels A, B and D. Correlations were assessed using the Pearson correlation coefficient in panels C and E. Symbols represent individual samples. \* $p < 0.05$ , \*\* $p < 0.01$ , \*\*\* $p < 0.001$ , and \*\*\*\* $p < 0.0001$ .

Supplemental figure 5

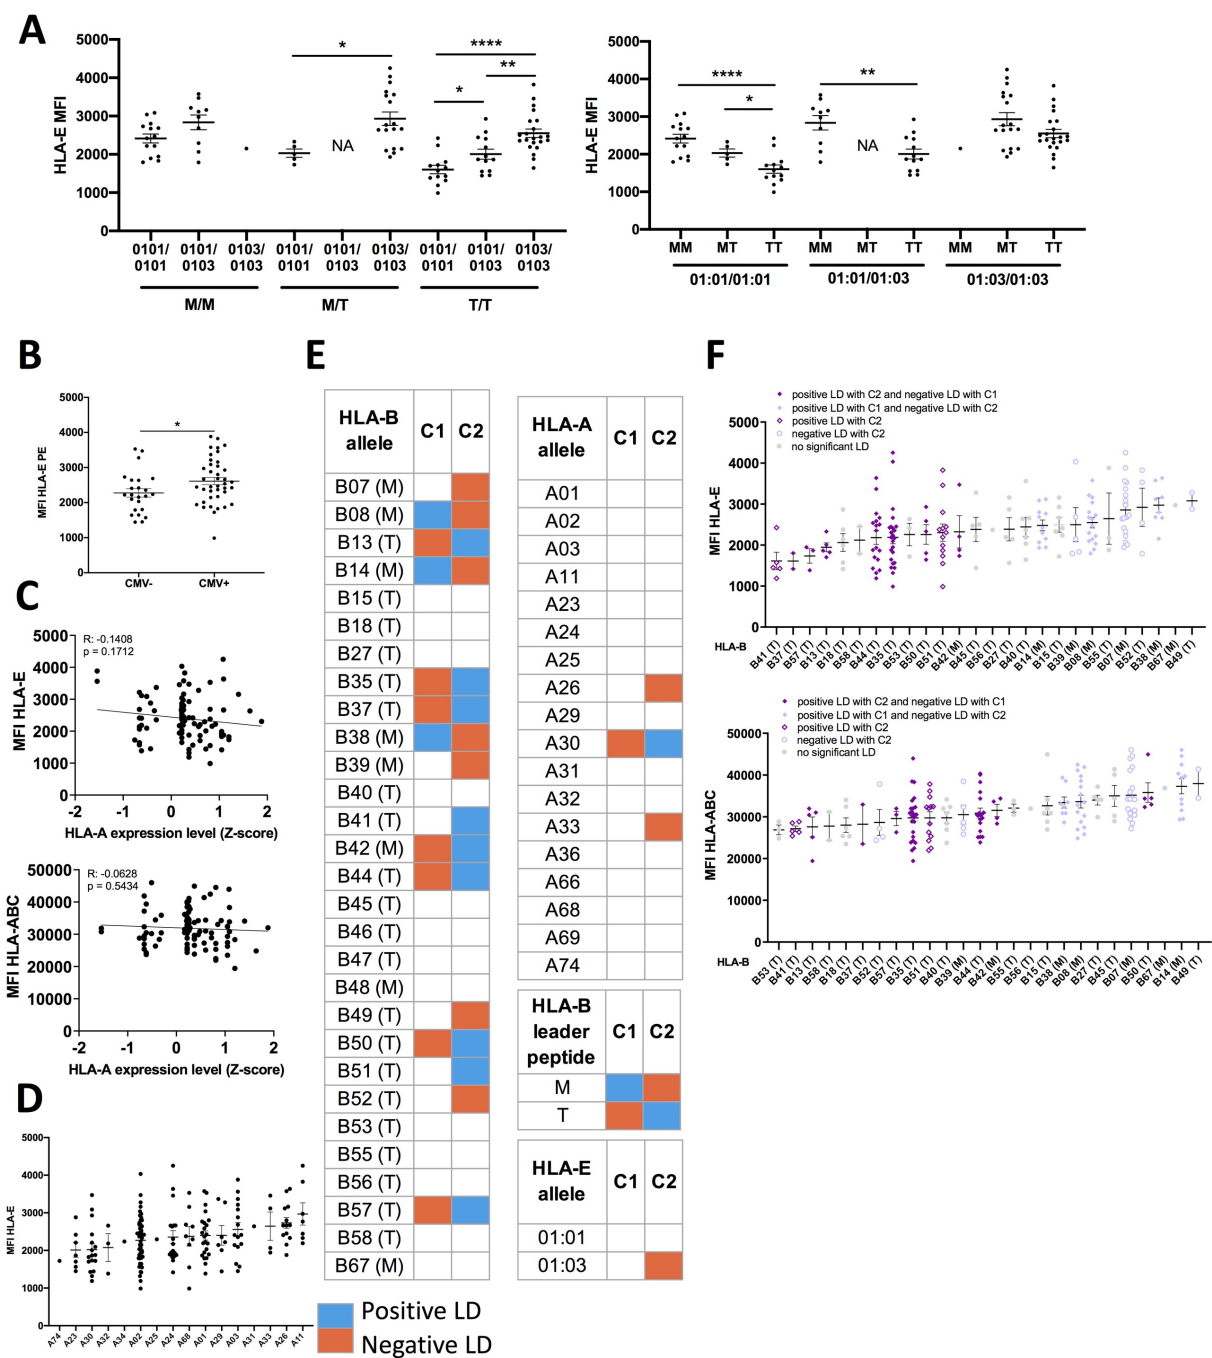

Supplemental Fig. 5. HLA-C epitope is predictive of HLA-E expression and significantly associated with certain HLA-A and HLA-B alleles. (A) HLA-E MFI segregated by HLA-B leader peptide and HLA-E epitope. (B) HLA-E MFI grouped by HCMV serostatus. (C) Correlation

between HLA-A expression level (by calculated Z-score) and HLA-E MFI or HLA-ABC MFI. (D) HLA-E MFI grouped by HLA-A alleles and ranked in croissant order. (E) Linkage disequilibrium between HLA-C epitope, HLA-B alleles, and HLA-A alleles. Positive and negative LD determined at a significance level of  $<0.05$ . (F) HLA-E and HLA-ABC MFI grouped by HLA-B alleles, coded by HLA-C epitope found to be in linkage disequilibrium with each allele and ranked in croissant order. HLA-B leader peptide noted in parentheses. T-tests were performed and mean  $\pm$  SEM presented in panels A and B. Correlations were assessed using the Pearson correlation coefficient in panel C. Linkage Disequilibrium were assessed using Chi-square test (E). Symbols represent individual samples.  $*p < 0.05$ ,  $**p < 0.01$ ,  $***p < 0.001$ , and  $****p < 0.0001$ .

Supplemental figure 6

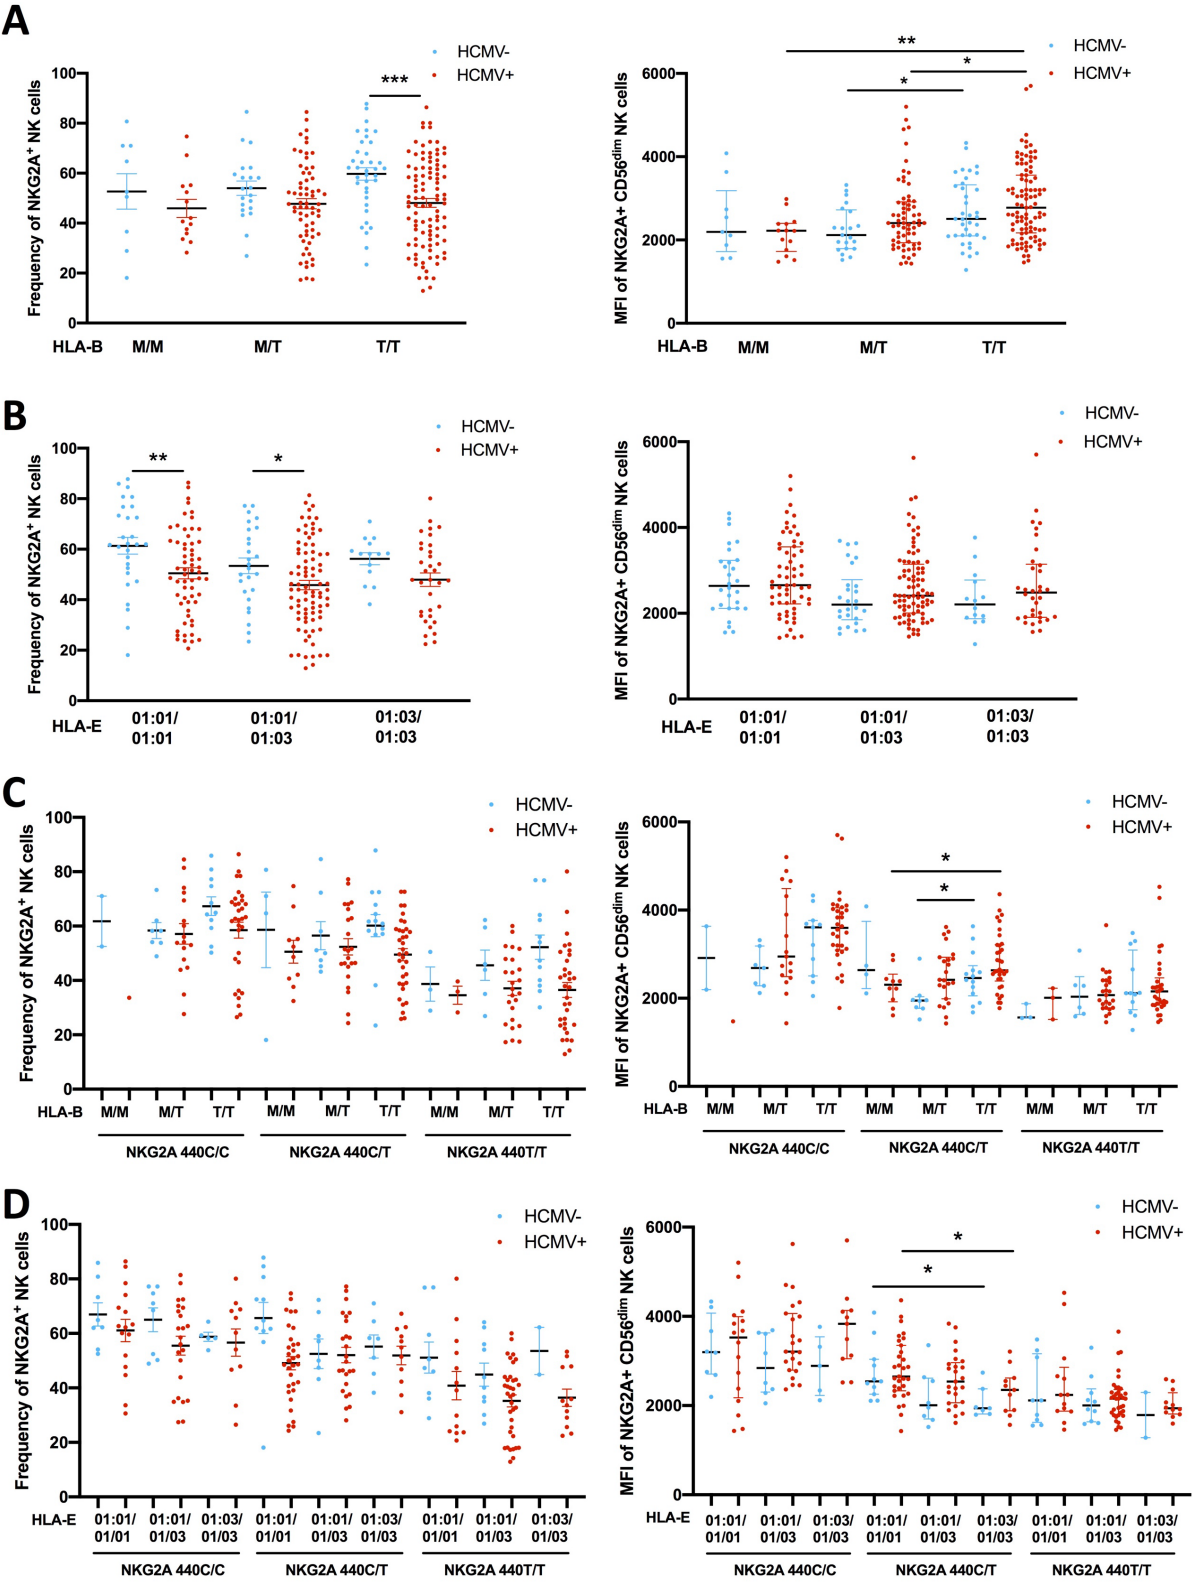

**Supplemental Fig. 6. Impact HLA-B leader peptide and HLA-E alleles on NKG2A expression.** (A) NKG2A<sup>+</sup> NK cell frequency and NKG2A MFI stratified by HLA-B leader peptide and HCMV serostatus. (B) NKG2A<sup>+</sup> NK cell frequency and NKG2A MFI stratified by HLA-E alleles and HCMV serostatus. (C) NKG2A<sup>+</sup> NK frequency and MFI stratified by HLA-B leader peptide, *NKG2A* SNP genotype, and HCMV serostatus. (D) NKG2A<sup>+</sup> NK frequency and MFI stratified by HLA-E alleles, *NKG2A* SNP genotype, and HCMV serostatus. T-tests were performed and mean  $\pm$  SEM are presented to analyze NKG2A frequencies (A-D). Mann-Whitney tests were performed and median  $\pm$  IQRs are presented to analyze NKG2A MFI (A-D). Symbols represent individual samples. \* $p < 0.05$ , \*\* $p < 0.01$ , \*\*\* $p < 0.001$ , and \*\*\*\* $p < 0.0001$ .
